# Supplementary material for: BMSC-derived exosomal miR-27a-3p and miR-196b-5p regulate bone remodeling in ovariectomized rats
Source: PeerJ. 2022 Sep 22;10:e13744. doi: 10.7717/peerj.13744 (PMC9509671; doi:10.7717/peerj.13744)
Supplement: Table S5 [file peerj-10-13744-s005.xlsx]

## Sheet: KEGG_significant
Table S5. Kyoto Encyclopedia of Genes and Genomes pathways enriched for the target genes of differentially expressed miRNAs
Pathway Id	pathway description	S gene number	TS gene number	B gene number	TB gene number	Pvalue of Fisher's Exact Test
ko05205	Proteoglycans in cancer	85	2216	203	8299	1.55461e-06
ko04066	HIF-1 signaling pathway	48	2216	102	8299	7.46276e-06
ko05162	Measles	61	2216	140	8299	1.04719e-05
ko04144	Endocytosis	100	2216	258	8299	1.1904e-05
ko05200	Pathways in cancer	183	2216	525	8299	1.28024e-05
ko04010	MAPK signaling pathway	112	2216	296	8299	1.3118e-05
ko04390	Hippo signaling pathway	65	2216	153	8299	1.4829e-05
ko05161	Hepatitis B	66	2216	156	8299	1.50392e-05
ko01521	EGFR tyrosine kinase inhibitor resistance	38	2216	79	8299	3.55123e-05
ko00510	N-Glycan biosynthesis	27	2216	50	8299	3.73242e-05
ko04218	Cellular senescence	70	2216	172	8299	3.94798e-05
ko05152	Tuberculosis	69	2216	169	8299	3.95808e-05
ko04721	Synaptic vesicle cycle	36	2216	75	8299	5.9892e-05
ko04142	Lysosome	52	2216	121	8299	7.18027e-05
ko04014	Ras signaling pathway	88	2216	232	8299	9.83331e-05
ko00561	Glycerolipid metabolism	30	2216	61	8299	0.000139645
ko00601	Glycosphingolipid biosynthesis - lacto and neolacto series	17	2216	28	8299	0.00015581
ko04060	Cytokine-cytokine receptor interaction	97	2216	266	8299	0.000243603
ko04115	p53 signaling pathway	33	2216	71	8299	0.000258845
ko04514	Cell adhesion molecules (CAMs)	62	2216	157	8299	0.000290238
ko05160	Hepatitis C	61	2216	154	8299	0.00029401
ko04151	PI3K-Akt signaling pathway	120	2216	342	8299	0.000299896
ko05145	Toxoplasmosis	47	2216	113	8299	0.00039232
ko05226	Gastric cancer	58	2216	147	8299	0.000461072
ko05169	Epstein-Barr virus infection	80	2216	216	8299	0.000480461
ko04068	FoxO signaling pathway	51	2216	126	8299	0.00049367
ko00533	Glycosaminoglycan biosynthesis - keratan sulfate	10	2216	14	8299	0.000603106
ko00564	Glycerophospholipid metabolism	41	2216	97	8299	0.000609247
ko04012	ErbB signaling pathway	37	2216	86	8299	0.000739408
ko05163	Human cytomegalovirus infection	85	2216	236	8299	0.000897262
ko05210	Colorectal cancer	37	2216	87	8299	0.000960683
ko04145	Phagosome	64	2216	170	8299	0.00104929
ko04150	mTOR signaling pathway	59	2216	155	8299	0.00118738
ko04668	TNF signaling pathway	44	2216	109	8299	0.00124497
ko04625	C-type lectin receptor signaling pathway	44	2216	109	8299	0.00124497
ko05230	Central carbon metabolism in cancer	28	2216	62	8299	0.00129401
ko04310	Wnt signaling pathway	59	2216	156	8299	0.00142188
ko04660	T cell receptor signaling pathway	42	2216	104	8299	0.00157295
ko05416	Viral myocarditis	32	2216	75	8299	0.00193516
ko04215	Apoptosis - multiple species	17	2216	33	8299	0.00204959
ko04062	Chemokine signaling pathway	65	2216	178	8299	0.00234066
ko04015	Rap1 signaling pathway	74	2216	207	8299	0.00234853
ko00515	Mannose type O-glycan biosynthesis	13	2216	23	8299	0.00235584
ko05215	Prostate cancer	39	2216	97	8299	0.00249734
ko04934	Cushing syndrome	58	2216	157	8299	0.00290317
ko04137	Mitophagy - animal	27	2216	62	8299	0.002989
ko04910	Insulin signaling pathway	49	2216	129	8299	0.00312248
ko04620	Toll-like receptor signaling pathway	37	2216	92	8299	0.00316143
ko00270	Cysteine and methionine metabolism	22	2216	48	8299	0.00330805
ko05030	Cocaine addiction	22	2216	48	8299	0.00330805
ko00591	Linoleic acid metabolism	18	2216	37	8299	0.00345373
ko04750	Inflammatory mediator regulation of TRP channels	43	2216	111	8299	0.00356463
ko04923	Regulation of lipolysis in adipocytes	25	2216	57	8299	0.00374508
ko04130	SNARE interactions in vesicular transport	16	2216	32	8299	0.00406599
ko04380	Osteoclast differentiation	47	2216	125	8299	0.00470427
ko01522	Endocrine resistance	37	2216	94	8299	0.0048399
ko05213	Endometrial cancer	25	2216	58	8299	0.00494159
ko04120	Ubiquitin mediated proteolysis	51	2216	138	8299	0.00498264
ko00010	Glycolysis / Gluconeogenesis	27	2216	64	8299	0.00508931
ko05167	Kaposi sarcoma-associated herpesvirus infection	68	2216	193	8299	0.00512157
ko05166	Human T-cell leukemia virus 1 infection	80	2216	233	8299	0.00551195
ko04152	AMPK signaling pathway	46	2216	123	8299	0.00576014
ko00650	Butanoate metabolism	13	2216	25	8299	0.00615394
ko05170	Human immunodeficiency virus 1 infection	76	2216	221	8299	0.00642125
ko05211	Renal cell carcinoma	28	2216	68	8299	0.00654063
ko00603	Glycosphingolipid biosynthesis - globo and isoglobo series	9	2216	15	8299	0.00670006
ko04659	Th17 cell differentiation	40	2216	105	8299	0.00673904
ko05224	Breast cancer	53	2216	147	8299	0.00752943
ko00062	Fatty acid elongation	15	2216	31	8299	0.00785281
ko05165	Human papillomavirus infection	111	2216	341	8299	0.00837853
ko04510	Focal adhesion	69	2216	200	8299	0.00838664
ko04080	Neuroactive ligand-receptor interaction	113	2216	348	8299	0.00853148
ko04350	TGF-beta signaling pathway	36	2216	94	8299	0.00893885
ko04670	Leukocyte transendothelial migration	42	2216	113	8299	0.00912051
ko05222	Small cell lung cancer	35	2216	91	8299	0.00914405
ko04216	Ferroptosis	18	2216	40	8299	0.00951358
ko04630	Jak-STAT signaling pathway	54	2216	152	8299	0.00977896
ko04340	Hedgehog signaling pathway	19	2216	43	8299	0.00986664
ko05214	Glioma	29	2216	73	8299	0.0102042
ko04662	B cell receptor signaling pathway	28	2216	70	8299	0.0103313
ko00140	Steroid hormone biosynthesis	26	2216	64	8299	0.010515
ko05321	Inflammatory bowel disease (IBD)	25	2216	61	8299	0.010563
ko00051	Fructose and mannose metabolism	16	2216	35	8299	0.0118699
ko05231	Choline metabolism in cancer	36	2216	96	8299	0.0129106
ko05223	Non-small cell lung cancer	26	2216	65	8299	0.0131702
ko04550	Signaling pathways regulating pluripotency of stem cells	49	2216	138	8299	0.0135349
ko00072	Synthesis and degradation of ketone bodies	6	2216	9	8299	0.0139929
ko04140	Autophagy - animal	46	2216	129	8299	0.015085
ko05225	Hepatocellular carcinoma	60	2216	175	8299	0.015269
ko04141	Protein processing in endoplasmic reticulum	56	2216	162	8299	0.0156941
ko04962	Vasopressin-regulated water reabsorption	18	2216	42	8299	0.0169387
ko01524	Platinum drug resistance	30	2216	79	8299	0.0182458
ko04072	Phospholipase D signaling pathway	52	2216	150	8299	0.018312
ko00785	Lipoic acid metabolism	3	2216	3	8299	0.0190196
ko04650	Natural killer cell mediated cytotoxicity	43	2216	121	8299	0.0194904
ko00640	Propanoate metabolism	14	2216	31	8299	0.0203987
ko04933	AGE-RAGE signaling pathway in diabetic complications	37	2216	102	8299	0.0207259
ko00260	Glycine, serine and threonine metabolism	17	2216	40	8299	0.021888
ko00532	Glycosaminoglycan biosynthesis - chondroitin sulfate / dermatan sulfate	10	2216	20	8299	0.0219045
ko00600	Sphingolipid metabolism	20	2216	49	8299	0.0219561
ko04979	Cholesterol metabolism	20	2216	49	8299	0.0219561
ko05212	Pancreatic cancer	28	2216	74	8299	0.0232008
ko04917	Prolactin signaling pathway	28	2216	74	8299	0.0232008
ko04931	Insulin resistance	38	2216	106	8299	0.0233828
ko05031	Amphetamine addiction	25	2216	65	8299	0.0250725
ko00730	Thiamine metabolism	8	2216	15	8299	0.0255387
ko00512	Mucin type O-glycan biosynthesis	12	2216	26	8299	0.0256439
ko04071	Sphingolipid signaling pathway	43	2216	123	8299	0.0259162
ko04612	Antigen processing and presentation	30	2216	81	8299	0.0261569
ko05220	Chronic myeloid leukemia	29	2216	78	8299	0.0269932
ko01040	Biosynthesis of unsaturated fatty acids	14	2216	32	8299	0.0275578
ko05100	Bacterial invasion of epithelial cells	28	2216	75	8299	0.027839
ko00562	Inositol phosphate metabolism	28	2216	75	8299	0.027839
ko00620	Pyruvate metabolism	16	2216	38	8299	0.0282737
ko04611	Platelet activation	44	2216	127	8299	0.0285546
ko04520	Adherens junction	27	2216	72	8299	0.0286913
ko00531	Glycosaminoglycan degradation	9	2216	18	8299	0.0292946
ko05140	Leishmaniasis	26	2216	69	8299	0.0295462
ko04024	cAMP signaling pathway	68	2216	208	8299	0.0306359
ko00040	Pentose and glucuronate interconversions	10	2216	21	8299	0.0320179
ko00240	Pyrimidine metabolism	22	2216	57	8299	0.0328783
ko05014	Amyotrophic lateral sclerosis (ALS)	21	2216	54	8299	0.0336487
ko05144	Malaria	20	2216	51	8299	0.0343706
ko04020	Calcium signaling pathway	62	2216	189	8299	0.0351912
ko00052	Galactose metabolism	12	2216	27	8299	0.0352114
ko04966	Collecting duct acid secretion	12	2216	27	8299	0.0352114
ko04975	Fat digestion and absorption	16	2216	39	8299	0.0363745
ko04070	Phosphatidylinositol signaling system	34	2216	96	8299	0.0366477
ko04928	Parathyroid hormone synthesis, secretion and action	37	2216	106	8299	0.0376329
ko00590	Arachidonic acid metabolism	28	2216	77	8299	0.0392129
ko04360	Axon guidance	59	2216	180	8299	0.0397412
ko04211	Longevity regulating pathway	31	2216	87	8299	0.0411018
ko00100	Steroid biosynthesis	9	2216	19	8299	0.0427703
ko00514	Other types of O-glycan biosynthesis	10	2216	22	8299	0.0449998
ko04210	Apoptosis	45	2216	134	8299	0.045355
ko04110	Cell cycle	42	2216	124	8299	0.0455007
ko05219	Bladder cancer	16	2216	40	8299	0.0460322
ko04136	Autophagy - other	13	2216	31	8299	0.0472672
ko04916	Melanogenesis	34	2216	98	8299	0.0487456
S gene number: The number of genes with significant differences annotated as specific GO. TS gene number: The number of genes with significant difference. B gene number: The number of genes annotated as specific GO. TB gene number: The total number of genes.
